# Supplementary material for: Insights into the complexity of presentation and management of patients: the Sport and Exercise Physician’s perspective
Source: HighWire-hosted journal article supplement (doi:10.1136/bmjsem-2021-001228), 2021-11-01
Supplement: bmjsem-2021-001228supp001_data_supplement.pdf [file bmjsem-2021-001228supp001_data_supplement.pdf]

**Supplementary file 1:** Survey questionnaire completed by the Sport and Exercise Physicians.

**Section 1 - Patient's referrer and main condition**

Date you saw the patient \_\_\_\_\_

Who referred the patient?

- GP  
 Specialist  
 No referral  
 Other

Please specify \_\_\_\_\_

How long was the consultation with the patient?

- < 15 minutes  
 15-30 minutes  
 30-45 minutes  
 45-60 minutes  
 >60 minutes

Please identify the main condition the patient presented with:

- Musculoskeletal  
 Other

Please specify: \_\_\_\_\_

Please select

- Hip/groin/hamstring  
 Knee  
 Calf/foot/ankle  
 Shoulder  
 Elbow/wrist/hand  
 Head/neck  
 Thoracic/lumbar spine  
 Other

Please specify \_\_\_\_\_

How long has the patient had symptoms?

- < 3 months  
 3-6 months  
 6-12 months  
 >12 months

Does the patient have any other conditions that you have/will be treating them for? If yes, please list them. \_\_\_\_\_

All remaining questions relate the to the patient's main condition that you saw them for.

**Previous consults and diagnoses for this condition**

Has the patient previously seen any of the following allied health professionals for this condition? (Select all that apply)

- Physiotherapist
- Osteopath
- Acupuncturist
- Podiatrist
- Exercise physiologist
- Chiropractor
- None of the above
- not sure

Approximately how many times in total for these allied health consultations? \_\_\_\_\_

Has the patient previously seen any other medical practitioners for this condition? (Select all that apply)

- GP
- Orthopedic surgeon
- Other surgeon
- Endocrinologist
- Rheumatologist
- Neurologist
- Other SEM physician
- Other
- Hasn't seen anyone else
- Not sure

Approximately how many times in total for other medical consultations? \_\_\_\_\_

Has the patient had any previous diagnoses by others for this condition?

- Yes
- No

What was the diagnosis? \_\_\_\_\_

Has this diagnosis changed following the consult with you? \_\_\_\_\_

---

**Previous treatments and investigations for the patient's main condition**


---

Has the patient already been prescribed/directed to take any medications by previous practitioners for this condition?  
(Select all that apply)

- No medications
- NSAIDs
- Steroidal anti-inflammatories
- Non-opioid analgesia (eg paracetamol)
- Opioid analgesia
- Neuromodulating drugs / antidepressants
- Supplements
- Other

Please specify:

---

Has the patient had any interventions already for this condition?  
(Select all that apply)

- Injectables
- Surgery
- Shockwave
- Other

Please specify which injectables:  
(Select all that apply)

- Cortisone injection
- PRP / Autologous blood
- Prolotherapy
- Viscosupplements
- Stem cell
- Other

Please specify

---

Please comment on whether these interventions were helpful for the patient

---

Has the patient had any previous radiological assessments for this condition? (i.e. requested by previous practitioners, not you)  
(Select all that apply)

- Xray
- MRI
- CT
- Ultrasound
- DEXA
- Other
- No radiological assessments

Please specify

---

Please comment on whether these radiological assessments were helpful in determining the diagnosis or management plan

---

Has the patient had any previous lab/pathology assessments for this condition?

- Yes
- No

---

**Patient's comorbidities/other issues**

---

Does the patient have any comorbidities/other issues relevant to the condition they presented with (which will need to be taken into account with their management)?

- Overweight/obesity
- Work-related concerns (including sport for professional athletes)
- Psychological issues
- Smoking cessation
- Hypertension
- Sleep issues
- Travel requirements
- No comorbidities/other issues
- Other

---

Please specify \_\_\_\_\_

---

Does the patient take any medication for a comorbidity/other issue that needed to be taken into account for their SEM treatment?

- Yes
- No

---

**Your SEM management plan for this patient**

---

Please briefly describe your management plan for this patient in the following sections.

---

Additional outward referrals (to whom, anticipated treatment):

\_\_\_\_\_

---

Investigations (eg radiology, pathology)

\_\_\_\_\_

---

Treatment:

\_\_\_\_\_

---

Estimate of the number of visits to a SEM physician anticipated for this patient (including this visit)

\_\_\_\_\_
