# Supplementary material for: Insights into the complexity of presentation and management of patients: the Sport and Exercise Physician’s perspective
Source: HighWire-hosted journal article supplement (doi:10.1136/bmjsem-2021-001228), 2021-11-01

**Supplementary file 3:** (a) medications (n=419), (b) treatments (n=158), and (c) injectables (n=75) prior to presentation to Sport and Exercise Physicians.

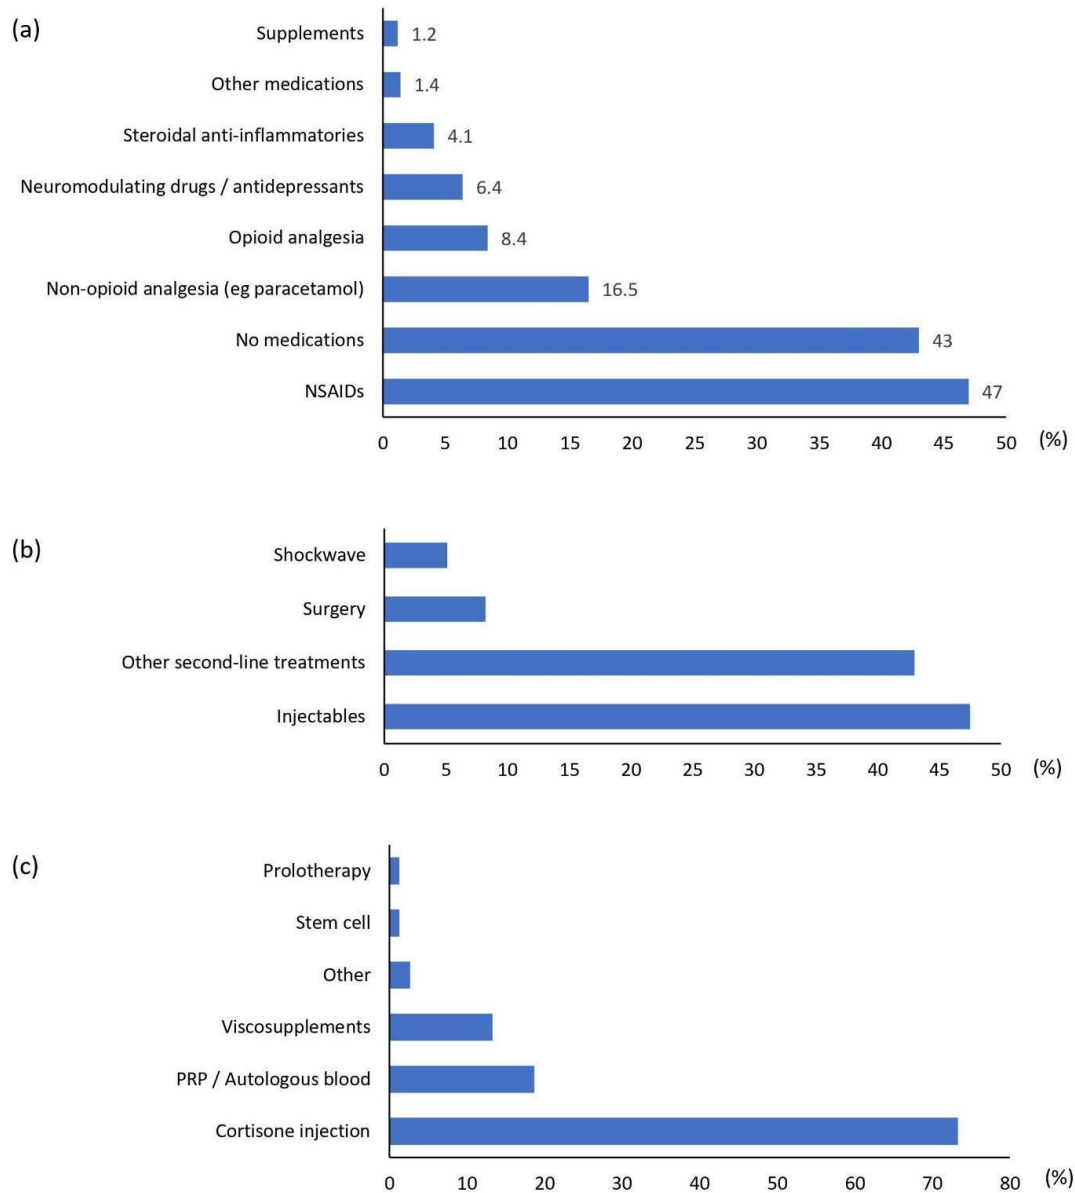

Supplement: bmjsem-2021-001228supp003_data_supplement.pdf [file bmjsem-2021-001228supp003_data_supplement.pdf]
