# Supplementary material for: Insights into the complexity of presentation and management of patients: the Sport and Exercise Physician’s perspective
Source: HighWire-hosted journal article supplement (doi:10.1136/bmjsem-2021-001228), 2021-11-01
Supplement: bmjsem-2021-001228supp004_data_supplement.xlsx [file bmjsem-2021-001228supp004_data_supplement.xlsx]

## Sheet: Sheet1
Item	Total visits	Average visits	Frequency	Item cost & source	Estimated total cost	Estimated cost per patient	Total estimated cost per patient	Remarks
Medical visits
GP consult	490 (n=186)	2.63	186	MBS item 36 = $75.05 (initial)	13959.3	75.05
			304	MBS item 23 = $38.75 (follow up)	11780	63.33	138.38
Specialist consult	86 (n=22)	3.91	86	MBS item 110 = $157.95	13583.7	157.95	157.95
Combined medical visits (GP and specialist)*	517 (n=80)							(*Most (n=78) combined visits include GP visit, therfore consider as one GP visit and remaining as specialist visits)
GP visits (initial)	78 (n=78)	1	78	MBS item 36 = $75.05 (initial)	5853.9	75.05
Specialist consult	439 (n=80)	5.49	439	MBS item 110 = $157.95	69340.1	866.75	941.8
							1238.13
Item	Total visits	Average visits	Frequency	Item cost & source	Estimated total cost	Estimated cost per patient	Total estimated cost per patient	Remarks
Allied Health Visits
Physiotherapist	991 (n=135)	7.34	135	TAC item PY600R = $74.48 (initial)	10054.8	74.48
			856	TAC item PY602R = $56.75 (standard)	48578	359.84	434.32
Physiotherapist (Chronic condition referred by medical practitioner)	N/A			MBS item 10960 = $64.20
Chiropractor	34 (n=6)	5.66	6	TAC item C600 = $59.11	354.66	59.11
			28	TAC item C602 = $48.30	1352.4	225.4	284.51
Osteopath	109 (n=7)	15.57	7	TAC item 0600 = $68.39	478.73	68.39
			102	TAC item 0602 = $55.01	5611.02	801.57	869.96
Exercise Physiologist				TAC item EP001 = $99.33
Podiatrist	41 (9)	4.55	9	TAC item F002 = $61.86 (initial)	556.74	61.86
			32	TAC item F012 = $49.50 (standard)	1584	176	237.86
Acupuncturist	8 (n=2)	4	2	TAC item A600 = $59.11 (initial)	118.22	59.11
			6	TAC item A602 = $48.30 (standard)	289.8	144.9	204.01
Combined allied health visits*	1234 (n=59)	20.91	59	TAC item PY600R = $74.48 (initial)	4394.32	74.48		(*Most (n=56) combined visits include physiotherapy visit, and therefore same item numbers were used for analysis)
			1175	TAC item PY602R = $56.75 (standard)	66681.2	1130.19	1204.67
							3235.33
Item	Total requests			Item cost & source	Estimated total cost			Remarks
Diagnostic Imaging	(patients)
X-ray (Hand/wrist/forearm/elbow/humerus)	7			MBS item 57509 = $40.35	282.45			Specific body part for x-ray is based on data for injured body site
X-ray (Foot/ankle/leg/femur)	32			MBS item 57521 = $44.05	1409.6
X-ray (Knee)	32			MBS item 57523 = $44.05	1409.6
X-ray (Shoulder)	18			MBS item 57703 = $54.80	986.4
X-ray (Pelvis/hip)	33			MBS item 57712 = $47.85	1579.05
X-ray (Spine) *	30			C – 58100 = $68.15
				T – 58103 = $55.95
				L/S -58106 = $78.15	2344.5			*Data for specific site of spine is not available, and therfore used the item numbers for L/S spine for calculations
				C/T/L/S – 58108 = $111.65
Other (X-ray)	7							item number/cost for general x-ray
Non-contrast CT (Spine)	10			T – 56221 = $243.60	2436
				L – 56223 = $243.60
Non-contrast CT (Extremities)	37			MBS item 56627 = $223.30	8262.1
SPECT CT (Bone scan)	11							item number for SPECT CT
US (Hand/wrist)	83	*		MBS item 55800 = $109.10	9055.3			Calculated for all USS
US (Shoulder)				MBS item 55808 = $109.10
US (Hip/groin)				MBS item 55817 = $109.10
US (Ankle)				MBS item 55836 = $109.10
MRI (Spine)	32			MBS item 63176 = $358.40	11468.8			Specific body part for MRI is based on data for injured body site
MRI (Hip/shoulder/knee/ankle/elbow)	110			MBS item 63322 – 63340 = $403.20	44352
MRI (Wrist/hand)	14			MBS item 63337 =$448.00	6272
MRI (Other)	12
DEXA	4			MBS item 12306 = $105.60	422.4
				Total estimated imaging cost	90280.2
				Average estimated cost per patient (n=419)	215.47
Item	Total requests			Item cost & source	Estimated total cost			Remarks
Pathology	(patients)
FBE				MBS item 65060 = $7.85
CRP				MBS item 66550 = $9.70
Pathology *	46							No data on separate lab test or number of tests
Item	Total requests			Item cost & source	Estimated total cost	Regime	Per patient/month	Remarks
Medication cost	(patients)
Paracetamol	69	Non-opioid analgesia (eg paracetamol)		$13.69 for 500mg, 100 tablets	8275.79	4 tablets/day	16.43
Paracetamol + Codeine				$14.95 for 500/30mg, 20 tablets				Average 7.3month duration
Ibuprofen	197	NSAIDs		$17.82 for 400mg, 30 tablets	76880.8	3 tablets/day	53.46	Lowest dose/standard regime
Diclofenac				$14.07 for 50mg, 50 tablets				Cheapest medication chosen
Naproxen				$17.01 for 750mg, 28 tablets
Tramadol				$14.67 for 100mg, 20 tablets
Oxycodone	35	Opioid analgesia		$20.09 for 5mg, 20 tablets	30798	4 tablets/day	120.54
Targin (Oxycodone + Naloxone)				$35.55 for 10/5mg, 28 tablets
Tapentadol				$27.67 for 50mg, 28 tablets
Pregabalin	27	Neuromodulating drugs / antidepressants		$24.93 for 75mg, 56 tablets	5264.54	2 tablets/day	26.71
Amitriptyline				$14.94 for 25mg, 50 tablets
				Total estimated medication cost	121219
Item	Total procedures			Item cost & source	Estimated total cost			Remarks
Procedures
US guided injection	55	Corticosteroid		MBS item 55850 = $183.05	10067.8
Injection under image intensification				MBS item 39013 = $112.55
Plasma Rich Platelet	14			Approx. $300/injection	4200			Based on a few private clinics. No discussion of gap.
Viscosupplement	10			Approx. $650/injection	6500			Based on a few private clinics. No discussion of gap.
Prolotherapy	1			Approx $200/injection	200			Based on a few private clinics. No discussion of gap.
Stem Cell	1
Shockwave therapy	8			Approx $100 for procedure (not inc. consultation)	800			Contact clinics for rough cost.

## Sheet: Sheet2
3-6 months	3
6-12 months	6
>12 months	12
>12 months	12
3-6 months	3
6-12 months	6
6-12 months	6
< 3 months	1
< 3 months	1
6-12 months	6
>12 months	12
3-6 months	3
>12 months	12
< 3 months	1
3-6 months	3
>12 months	12
>12 months	12
>12 months	12
< 3 months	1
6-12 months	6
6-12 months	6
< 3 months	1
>12 months	12
< 3 months	1
>12 months	12
3-6 months	3
6-12 months	6
>12 months	12
>12 months	12
3-6 months	3
>12 months	12
< 3 months	1
< 3 months	1
< 3 months	1
>12 months	12
>12 months	12
< 3 months	1
< 3 months	1
>12 months	12
>12 months	12
6-12 months	6
>12 months	12
>12 months	12
< 3 months	1
< 3 months	1
< 3 months	1
< 3 months	1
>12 months	12
>12 months	12
>12 months	12
>12 months	12
6-12 months	6
6-12 months	6
6-12 months	6
< 3 months	1
< 3 months	1
< 3 months	1
3-6 months	3
>12 months	12
3-6 months	3
3-6 months	3
< 3 months	1
>12 months	12
>12 months	12
6-12 months	6
< 3 months	1
>12 months	12
>12 months	12
< 3 months	1
< 3 months	1
>12 months	12
6-12 months	6
>12 months	12
6-12 months	6
>12 months	12
>12 months	12
>12 months	12
< 3 months	1
< 3 months	1
6-12 months	6
>12 months	12
< 3 months	1
>12 months	12
3-6 months	3
>12 months	12
>12 months	12
3-6 months	3
< 3 months	1
3-6 months	3
3-6 months	3
3-6 months	3
>12 months	12
< 3 months	1
>12 months	12
< 3 months	1
3-6 months	3
3-6 months	3
3-6 months	3
< 3 months	1
3-6 months	3
6-12 months	6
6-12 months	6
>12 months	12
3-6 months	3
6-12 months	6
6-12 months	6
6-12 months	6
>12 months	12
>12 months	12
>12 months	12
>12 months	12
>12 months	12
>12 months	12
< 3 months	1
>12 months	12
3-6 months	3
< 3 months	1
< 3 months	1
>12 months	12
6-12 months	6
>12 months	12
< 3 months	1
>12 months	12
< 3 months	1
3-6 months	3
< 3 months	3
>12 months	12
>12 months	12
6-12 months	6
>12 months	12
3-6 months	3
>12 months	12
3-6 months	3
>12 months	12
>12 months	12
>12 months	12
3-6 months	3
>12 months	12
>12 months	12
>12 months	12
3-6 months	3
< 3 months	1
3-6 months	3
3-6 months	3
>12 months	12
>12 months	12
>12 months	12
3-6 months	3
>12 months	12
>12 months	12
3-6 months	3
6-12 months	6
< 3 months	1
6-12 months	6
< 3 months	1
< 3 months	1
>12 months	12
< 3 months	1
6-12 months	6
< 3 months	1
6-12 months	6
3-6 months	3
3-6 months	3
< 3 months	1
>12 months	12
>12 months	12
< 3 months	1
>12 months	12
>12 months	12
< 3 months	1
>12 months	12
>12 months	12
< 3 months	1
>12 months	12
3-6 months	3
3-6 months	3
3-6 months	3
>12 months	12
3-6 months	3
< 3 months	1
>12 months	12
>12 months	12
6-12 months	6
3-6 months	3
>12 months	12
>12 months	12
3-6 months	3
6-12 months	6
>12 months	12
3-6 months	3
6-12 months	6
3-6 months	3
>12 months	12
>12 months	12
< 3 months	1
>12 months	12
< 3 months	1
< 3 months	3
>12 months	12
>12 months	12
< 3 months	3
>12 months	12
6-12 months	6
>12 months	12
>12 months	12
>12 months	12
3-6 months	3
< 3 months	1
6-12 months	6
3-6 months	3
3-6 months	3
6-12 months	6
6-12 months	6
>12 months	12
>12 months	12
>12 months	12
3-6 months	3
>12 months	12
6-12 months	6
6-12 months	6
6-12 months	6
6-12 months	6
>12 months	12
3-6 months	3
3-6 months	3
3-6 months	3
3-6 months	3
>12 months	12
6-12 months	6
6-12 months	6
>12 months	12
3-6 months	3
3-6 months	3
3-6 months	3
>12 months	12
< 3 months	3
>12 months	12
>12 months	12
>12 months	12
< 3 months	1
>12 months	12
< 3 months	1
6-12 months	6
>12 months	12
6-12 months	6
6-12 months	6
3-6 months	3
< 3 months	1
3-6 months	3
< 3 months	1
6-12 months	6
< 3 months	1
< 3 months	1
< 3 months	1
>12 months	12
< 3 months	1
6-12 months	6
>12 months	12
>12 months	12
>12 months	12
>12 months	12
3-6 months	3
>12 months	12
>12 months	12
6-12 months	6
>12 months	12
3-6 months	3
>12 months	12
6-12 months	6
3-6 months	3
>12 months	12
>12 months	12
3-6 months	3
>12 months	12
>12 months	12
6-12 months	6
>12 months	12
< 3 months	1
>12 months	12
>12 months	12
>12 months	12
6-12 months	6
< 3 months	1
3-6 months	3
6-12 months	6
6-12 months	6
>12 months	12
>12 months	12
>12 months	12
6-12 months	6
3-6 months	3
>12 months	12
6-12 months	6
>12 months	12
>12 months	12
>12 months	12
>12 months	12
>12 months	12
< 3 months	1
>12 months	12
>12 months	12
< 3 months	1
>12 months	12
3-6 months	3
6-12 months	6
>12 months	12
< 3 months	1
>12 months	12
3-6 months	3
>12 months	12
>12 months	12
>12 months	12
>12 months	12
>12 months	12
< 3 months	1
>12 months	12
6-12 months	6
>12 months	12
6-12 months	6
>12 months	12
>12 months	12
>12 months	12
6-12 months	6
>12 months	12
>12 months	12
>12 months	12
>12 months	12
>12 months	12
>12 months	12
6-12 months	6
3-6 months	3
>12 months	12
6-12 months	6
3-6 months	3
>12 months	12
>12 months	12
3-6 months	3
>12 months	12
>12 months	12
>12 months	12
>12 months	12
6-12 months	6
>12 months	12
3-6 months	3
>12 months	12
>12 months	12
>12 months	12
>12 months	12
3-6 months	3
>12 months	12
6-12 months	6
>12 months	12
>12 months	12
>12 months	12
< 3 months	1
>12 months	12
6-12 months	6
>12 months	12
>12 months	12
3-6 months	3
>12 months	12
>12 months	12
>12 months	12
6-12 months	6
6-12 months	6
>12 months	12
< 3 months	1
>12 months	12
6-12 months	6
>12 months	12
3-6 months	3
3-6 months	3
3-6 months	3
>12 months	12
>12 months	12
< 3 months	3
6-12 months	6
3-6 months	3
>12 months	12
< 3 months	1
>12 months	12
< 3 months	1
>12 months	12
>12 months	12
3-6 months	3
>12 months	12
< 3 months	1
>12 months	12
3-6 months	3
>12 months	12
< 3 months	1
>12 months	12
>12 months	12
6-12 months	6
< 3 months	1
< 3 months	1
< 3 months	1
>12 months	12
< 3 months	1
>12 months	12
< 3 months	1
< 3 months	1
>12 months	12
< 3 months	1
>12 months	12
6-12 months	6
6-12 months	6
>12 months	12
>12 months	12
>12 months	12
3-6 months	3
>12 months	12
6-12 months	6
6-12 months	6
>12 months	12
>12 months	12
>12 months	12
3-6 months	3
>12 months	12
	3072
	419
	7.33174
