# Supplementary material for: Insights into the complexity of presentation and management of patients: the Sport and Exercise Physician’s perspective
Source: HighWire-hosted journal article supplement (doi:10.1136/bmjsem-2021-001228), 2021-11-01

**Supplementary file 5: General health status of the patients at first visit and at 8-weeks; reported using EQ- 5D-5L questionnaire**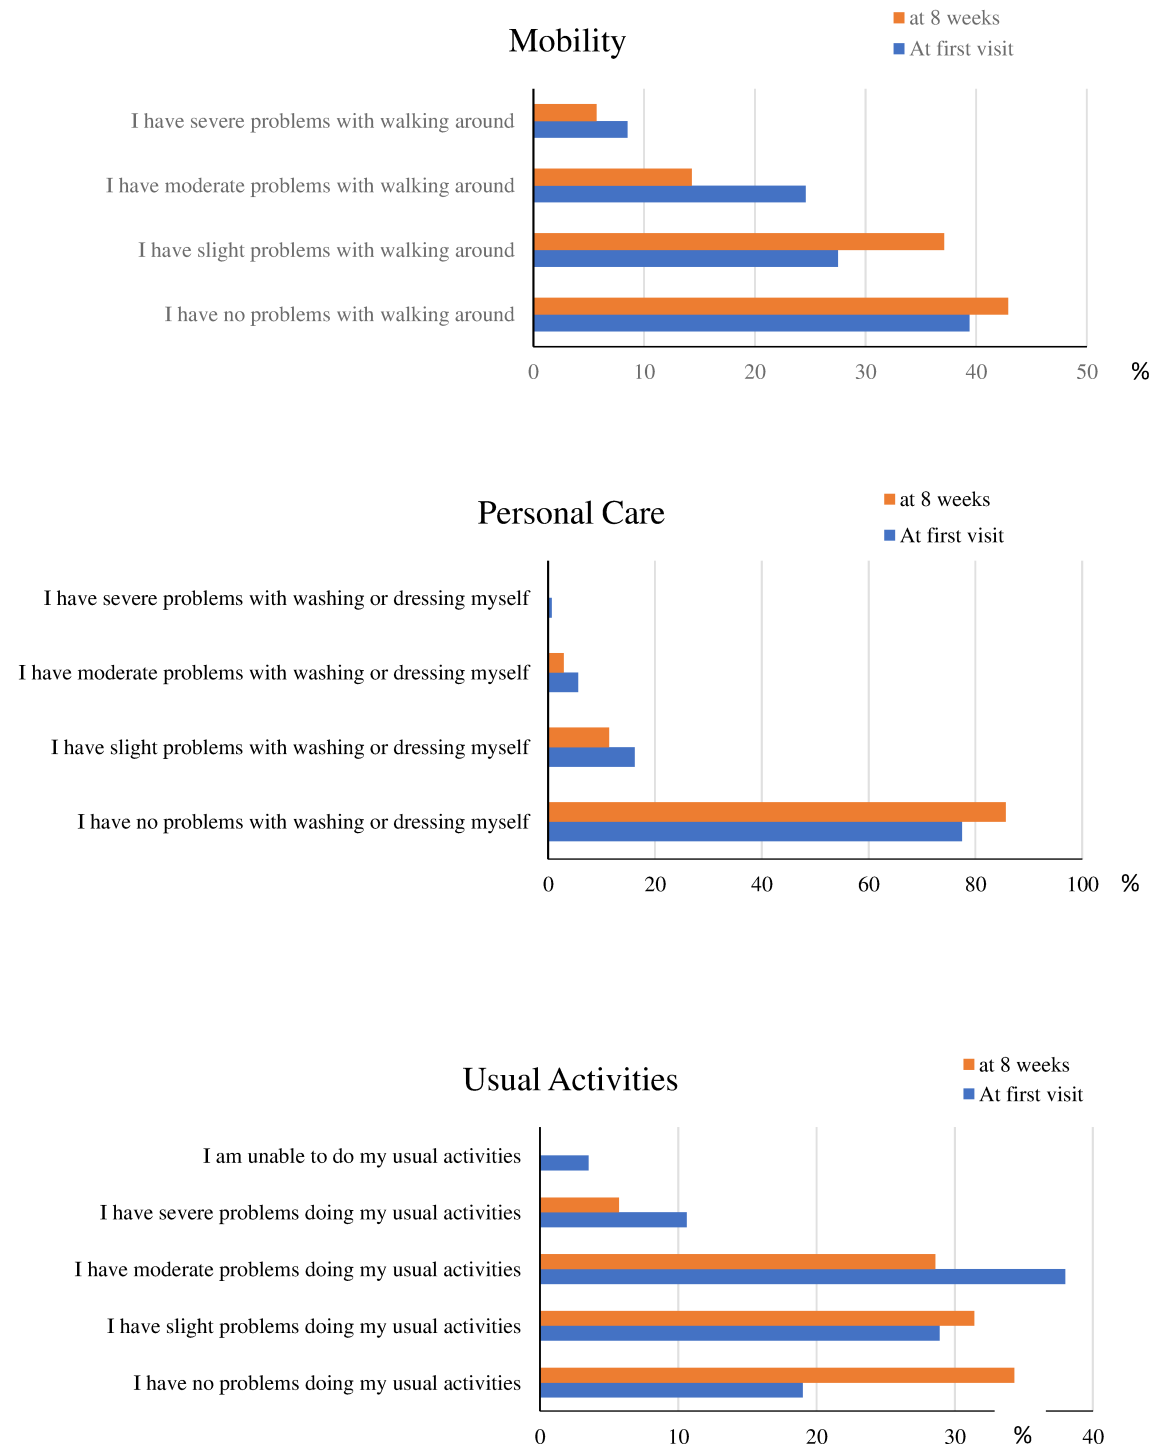

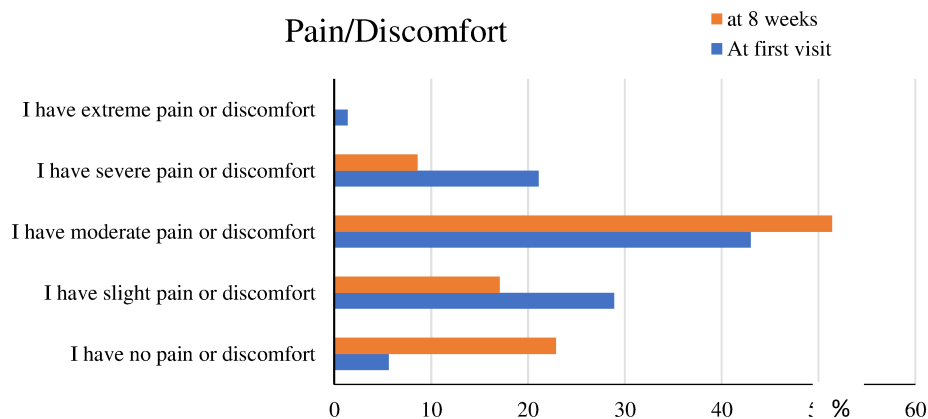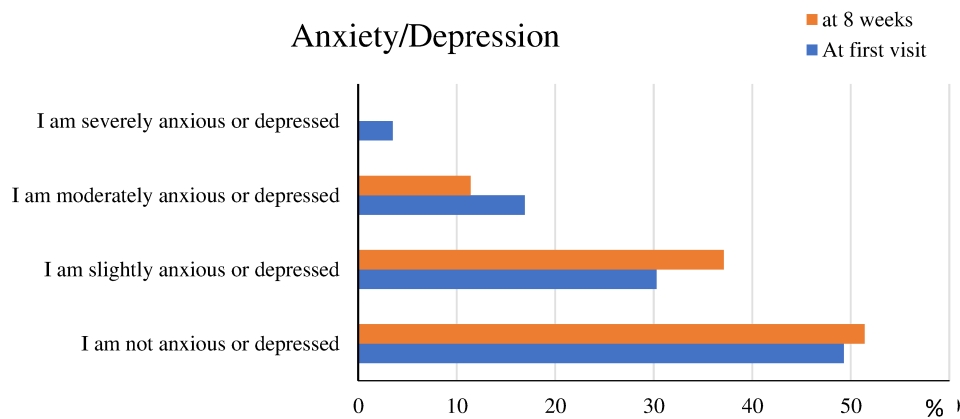

Supplement: bmjsem-2021-001228supp005_data_supplement.pdf [file bmjsem-2021-001228supp005_data_supplement.pdf]
